# Supplementary material for: Facile solution routes for the syntheses of GeTe nanocrystals
Source: Royal Society of Chemistry journal article supplement (doi:10.1039/c2ra21790b), 2012-10-05
Supplement: c2ra21790b.pdf [file c2ra21790b.pdf]

## Supporting Information

### Two Solution Routes for the Syntheses of GeTe Nanocrystals

Myeong Ho Kim, Gajendra Gupta and Jinkwon Kim\*

Department of Chemistry, Nanotechnology Laboratory, Kongju National  
University, 182-Shinkwan, Kongju-Chungnam 314-701, Republic of Korea

Corresponding email: [jkim@kongju.ac.kr](mailto:jkim@kongju.ac.kr)

### 1. STEM image and EDS spectrum along with elemental mapping

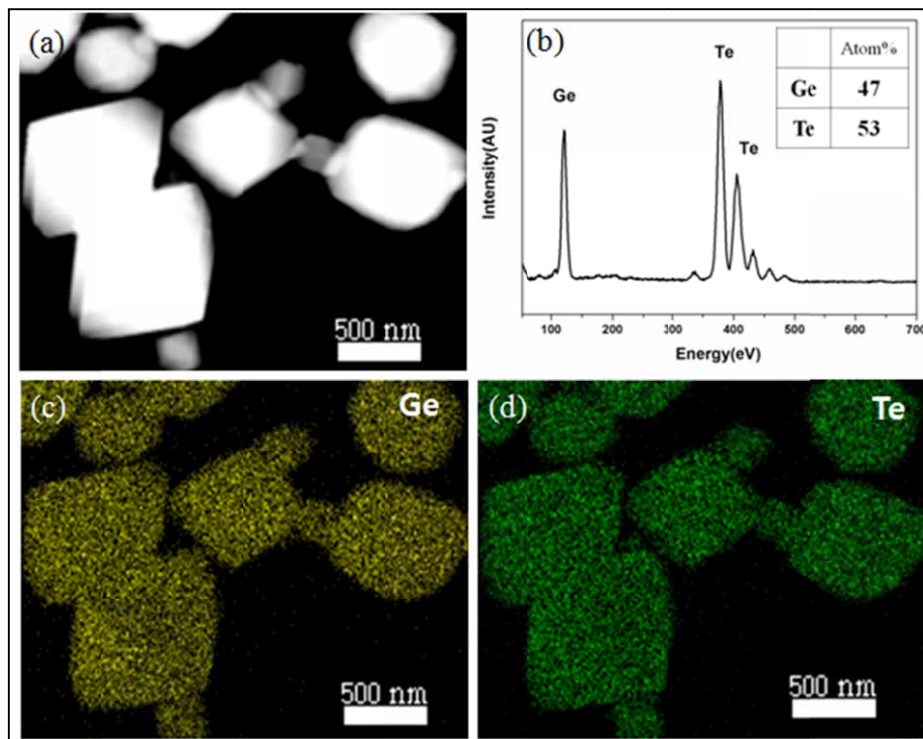

Figure S1. (a) STEM image of the GeTe microcrystals produced from reactions of  $\text{Ge}^{2+}$  and TOP-Te in OLA at  $150^\circ\text{C}$  and reaction time of 1h (sample **1**). (b) EDS spectrum, along with the associated EDS element mapping data showing uniform distribution of (c) Ge and (d) Te throughout each particle.

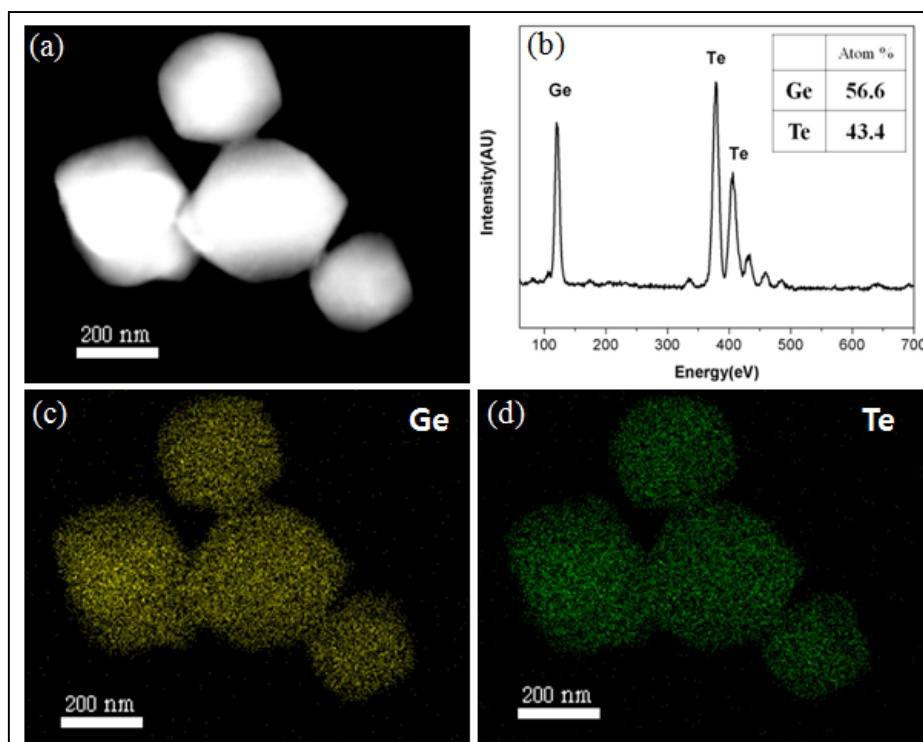

Figure S2. (a) STEM image of the GeTe microcrystals produced from reactions of  $\text{Ge}^{2+}$  and  $(\text{Et}_3\text{Si})_2\text{Te}$  in TOPO at 250 °C and reaction time of 1h (sample 2). (b) EDS spectrum, along with the associated EDS element mapping data showing uniform distribution of (c) Ge and (d) Te throughout each particle.

## 2. XPS spectra of as-synthesized GeTe product.

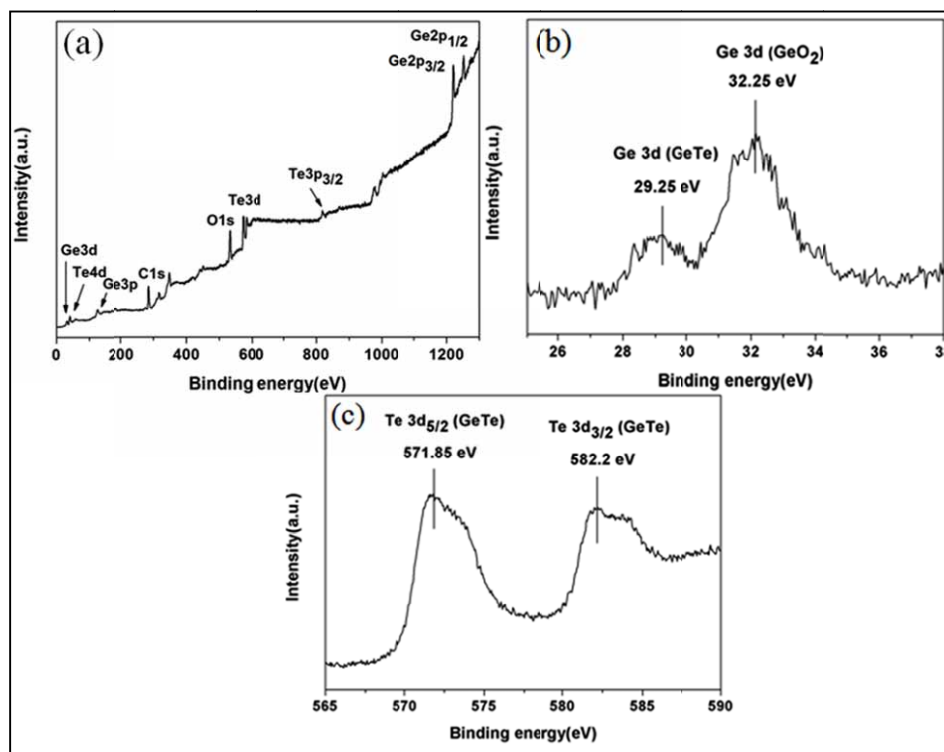

Figure S3. XPS spectra of the as-synthesized GeTe product (sample **1**): (a) XPS survey spectrum (b) Germanium region (c) Tellurium region.

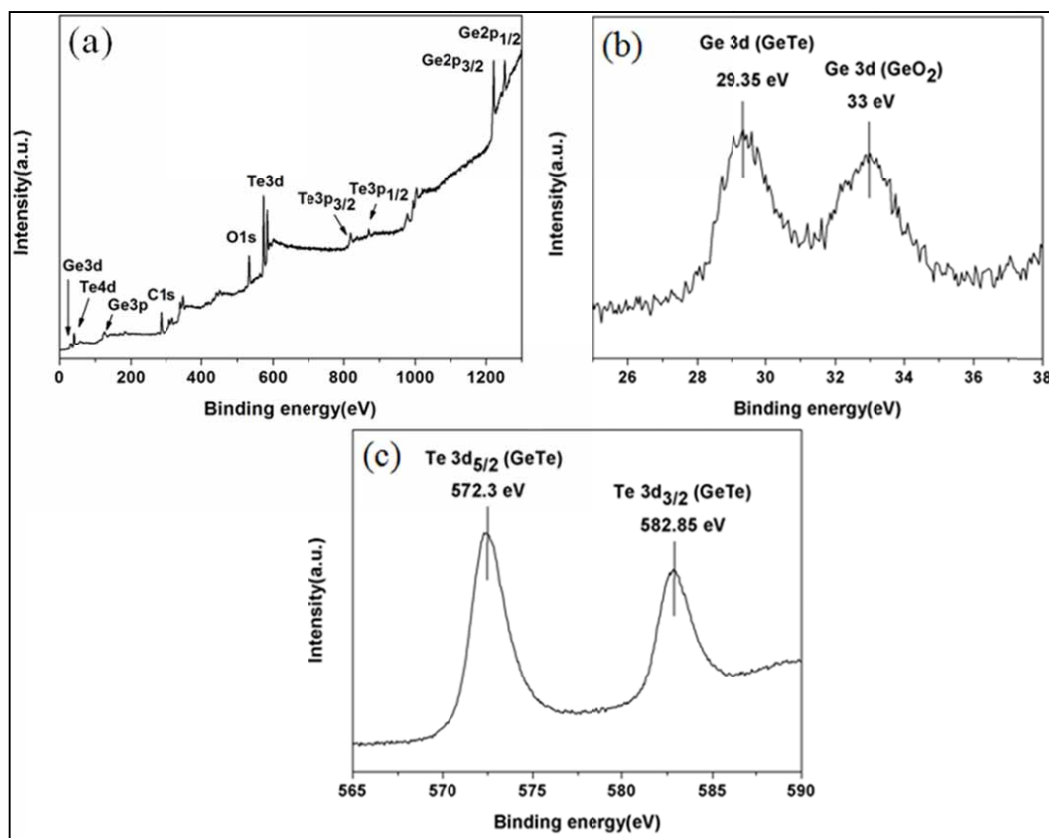

Figure S4. XPS spectra of the as-synthesized GeTe product (sample 2): (a) XPS survey spectrum (b) Germanium region (c) Tellurium region.
